# Supplementary material for: Chromatin Landscapes of Retroviral and Transposon Integration Profiles
Source: PLoS Genet. 2014 Apr 10;10(4):e1004250. doi: 10.1371/journal.pgen.1004250 (PMC3983033; doi:10.1371/journal.pgen.1004250)
Supplement: Table S1 — List of statistical procedures used in the main text. (XLS) [file pgen.1004250.s010.xls]

## Sheet: Sheet1
Figure	Data type	Statistical procedure
1	Insertion counts and control counts	Binomial test
2	Insertion counts and control counts	Cochran-Armitage trend test
3	Insertion counts and control counts for two systems.	Cochran–Mantel–Haenszel test and Binomial test
4	Rank-transformed feature values	t-test on ranks
5	Discretized rank-transformed feature values	Bayesian network inference and conditional mutual information
6	Insertion counts and CIS counts	Binomial test
